# Supplementary material for: Identification and Transcriptome Analysis of Genes Related to Membrane Lipid Regulation in Sweet Sorghum under Salt Stress
Source: MDPI journal article supplement (doi:10.3390/ijms23105465), 2022-05-13
Supplement: s1 [file s1]

**Table S1** List of primers for quantitative real-time PCR

| Gene name         | Primer sequence (5'-3')                            |
|-------------------|----------------------------------------------------|
| SORBI_3010G001700 | F: CCGCACTTTGGGCTGTACTA<br>R: CTGTCGTCATATCCGGAGCC |
| SORBI_3004G286700 | F: TTCTCGACACAACAGGGAGC<br>R: TGACGTGGTTCTGGTACAGC |
| SORBI_3006G221500 | F: TGTTCGGTCAGCTCTACGTG<br>R: GGGAACAGGATGAGGGACAG |
| SORBI_3007G211900 | F: TCGTGACGGATTTGGGGAAG<br>R: TGATGATGATGTCCGGCTCG |
| SORBI_3003G150200 | F: GTCTACCCCGAGATGTGGCA<br>R: TGCCTTGAGCCAGTCGATGA |
| SORBI_3010G270700 | F: GAGCGCCATCAGTACAGGAG<br>R: ACAGTGGAATGTTGCCTCCC |
| SORBI_3003G318700 | F: TGTGCCAAGACAGATCCAC<br>R: ACGCATAAGACACTTGGGCA  |
| SORBI_3001G412100 | F: CTGCCCACCGTGCTTACTAT<br>R: CAGGCAGACTTGGGTCTCTG |
| SORBI_3001G365100 | F: ACGCCAGCTCCAAGTACAAC<br>R: GGCCTTGAAGAAAGGACCCC |
| SORBI_3010G160033 | F: GGACTGGAAATGGCGGAAGA<br>R: GTCAGGCAACCAGTCCATGA |
| SORBI_3001G448800 | F: GCCAGGTCTTGAAGGTCGTT<br>R: ACTCTCTCCTGCCTCCGATA |
| SORBI_3005G222500 | F: GCGTGGAATGTGCAAGTGTT<br>R: CAGGTGTCGGGTGACGTTTA |
| <i>Actin</i>      | F: TGGCATCTCTCAGCACATTCC<br>R: AATGGCTCTCTCGGCTTGC |
